# Supplementary material for: miRMut: Annotation of mutations in miRNA genes from human whole-exome or whole-genome sequencing
Source: PubMed Central journal article supplement — STAR Protoc. 2021 Dec 15;3(1):101023. doi: 10.1016/j.xpro.2021.101023 (PMC8686061; doi:10.1016/j.xpro.2021.101023), 2021-12-15
Supplement: mmc1.pdf [file mmc1.pdf]

**Supplementary Table S1. Output and transitional tables columns description. All columns are listed in an alphabetical order. Related to Steps 1-5 and Expected outcomes.**

| Column name          | Column description                                                                                                                                           | Possible values                      |
|----------------------|--------------------------------------------------------------------------------------------------------------------------------------------------------------|--------------------------------------|
| alg                  | algorithm used for detection of mutations                                                                                                                    | e.g.: mutect2, somatic sniper        |
| alt                  | alternative allele                                                                                                                                           | e.g.: G, A, GAA                      |
| arm                  | in which part of miRNA precursor mutation is located                                                                                                         | 5p, loop, 3p                         |
| balance              | arm from which the main miRNA is generated; defined based on deep sequencing reads (miRBase), [for details see (Urbanek-Trzeciak et al., 2020)]              | 5p, 3p, both, undefined              |
| based_on_coordinates | indicates whether used coordinates were defined based on miRBase annotations or were predicted based on miRNA structure                                      | yes, no                              |
| BQ_alt_norm          | BQ metric from VCF file for alternative allele in normal sample                                                                                              | e.g.: 0                              |
| BQ_alt_tum           | BQ metric from VCF file for alternative allele in tumor sample                                                                                               | e.g.: 32                             |
| BQ_ref_norm          | BQ metric from VCF file for reference allele in normal sample                                                                                                | e.g.: 30                             |
| BQ_ref_tum           | BQ metric from VCF file for reference allele in tumor sample                                                                                                 | e.g.: 31                             |
| chrom                | chromosome                                                                                                                                                   | e.g.: chr1, chrX                     |
| complex              | if mutations are complex (multiple mutations in single miRNA gene in single sample)                                                                          | 0 (no), 1 (yes)                      |
| confidence           | as high-confidence miRNA genes, we considered genes coding for miRNA precursors annotated as “high confidence” in miRBase and/or deposited in MiRGeneDB v2.0 | High, Low                            |
| cut_region           | whether the mutation is within Drosha or Dicer cut region                                                                                                    | 0 (no), 1 (yes)                      |
| duplex               | whether the mutation is within duplex                                                                                                                        | 0 (no), 1 (yes)                      |
| eval                 | if filtering is performed it indicates if a mutation passed the filtering                                                                                    | True, False                          |
| filename             | path to analysed VCF file                                                                                                                                    | e.g.:<br>/home/Documents/0001.vcf.gz |
| filter               | filter column from VCF file                                                                                                                                  | e.g.: PASS                           |
| format               | format column from VCF file                                                                                                                                  | e.g.: GT:AD:BQ:DP:SS                 |
| from_start           | nucleotide position from start of miRNA region in which mutation is located (e.g., within seed, 5' flanking sequence)                                        | e.g.: 1, 3                           |

|                    |                                                                                                                                                                                                                                                                                            |                                                                            |
|--------------------|--------------------------------------------------------------------------------------------------------------------------------------------------------------------------------------------------------------------------------------------------------------------------------------------|----------------------------------------------------------------------------|
| from_end           | nucleotide position from end of miRNA region in which mutation is located (e.g., within seed, 5' flanking sequence)                                                                                                                                                                        | e.g.: -1, -25                                                              |
| hgvs               | noncoding HGVS nomenclature of the mutation in the reference to the miRBase coordinates<br>*Note that annotation of some indels may not match the latest HGVS recommendations; for multimutations (multiple changes in a single position in one sample) HGVS nomenclature is not available | e.g.: n.90G>A, n.67+21G>A, n.1-15delA                                      |
| hgvs_g             | genomic HGVS nomenclature of the mutation; for multimutations HGVS is not available                                                                                                                                                                                                        | e.g.:<br>NC_000010.11:g.17845137C>A,<br>NC_000001.11:g.1167872_1167873insT |
| if_complex         | if there was any complex mutations in the gene                                                                                                                                                                                                                                             | 0 (no), 1 (yes)                                                            |
| ID                 | miRBase ID                                                                                                                                                                                                                                                                                 | e.g.: MI0000737                                                            |
| indiv_ID           | identifier of the sample                                                                                                                                                                                                                                                                   | e.g.: 001                                                                  |
| indiv_name         | sample identifier                                                                                                                                                                                                                                                                          | e.g.: sample01                                                             |
| indiv_name_count   | how many mutations were found in a position (or in a indicated gene)                                                                                                                                                                                                                       | e.g.: 1                                                                    |
| indiv_name_nunique | how many samples had specific mutation (or mutation in a indicated gene)                                                                                                                                                                                                                   | e.g.: 1                                                                    |
| info               | info column from VCF file                                                                                                                                                                                                                                                                  | e.g.:<br>ACGTNacgtnMINUS=0,0,23,1,0,0,0,11,4,0...                          |
| mirgenedb_ID       | miRgeneDB ID                                                                                                                                                                                                                                                                               | e.g.: Hsa-Mir-8-P1a_pre                                                    |
| motifs             | whether any motif was disturbed as a result of the mutation                                                                                                                                                                                                                                | 0 (no), 1 (yes)                                                            |
| motifs_{ }         | information for each checked motif if there was loss of a motif as a result of the mutation                                                                                                                                                                                                | -, loss                                                                    |
| mutation_type      | mutation type: substitution, insertion, deletion, insertion-deletion, multimutation                                                                                                                                                                                                        | subst, ins, del, indel, multimutation                                      |
| name               | miRNA region name built by pre-miRNA name and precursor region connected by an underscore                                                                                                                                                                                                  | e.g.: hsa-mir-200a_flanking-5, hsa-mir-511_post-seed                       |
| no_of_loc          | internal check column                                                                                                                                                                                                                                                                      | 1                                                                          |
| norm_alt_count     | count of reads supporting alternative allele in normal sample                                                                                                                                                                                                                              | e.g.: 0                                                                    |
| norm_ref_count     | count of reads supporting reference allele in normal sample                                                                                                                                                                                                                                | e.g.: 20                                                                   |
| normal             | normal column from VCF file in a structure as format column dictates                                                                                                                                                                                                                       | e.g.: 0/0:53,0:34,0:53                                                     |

|                          |                                                                     |                                                         |
|--------------------------|---------------------------------------------------------------------|---------------------------------------------------------|
| orientation              | miRNA gene orientation                                              | "+, -"                                                  |
| pos                      | genomic position of the mutation                                    | e.g.: 1167859, 20633667                                 |
| pos_count                | number of mutations in a miRNA gene                                 | e.g.: 3                                                 |
| pos_nunique              | number of unique mutated positions in a miRNA gene                  | e.g.: 1                                                 |
| pre_name                 | precursor name                                                      | e.g.: hsa-mir-200a, hsa-mir-6084                        |
| QSS_alt_nor              | quality score for alternative allele for normal sample              | e.g.: 0                                                 |
| QSS_alt_tum              | quality score for alternative allele for tumor sample               | e.g.: 99                                                |
| QSS_ref_nor              | quality score for reference allele for normal sample                | e.g.: 3001                                              |
| QSS_ref_tum              | quality score for reference allele for tumor sample                 | e.g.: 1650                                              |
| qual                     | qual column from VCF file                                           | e.g.: .                                                 |
| ref                      | reference allele                                                    | e.g.: C, GCA                                            |
| sample_ID_normal_aliquot | ID of aliquote of normal sample from VCF file                       | e.g.: 534gjhg345-sdfv689                                |
| sample_ID_normal_name    | name of normal sample from VCF file                                 | e.g.: TCGA-66678-asasd                                  |
| sample_ID_tumor_aliquot  | ID of aliquote of tumor sample from VCF file                        | e.g.: skdjf879xc-xcv6s8df                               |
| sample_ID_tumor_name     | name of tumor sample from VCF file                                  | e.g.: TCGA-2934592-msandf8                              |
| seed                     | whether mutation is located within seed                             | 0 (no), 1 (yes)                                         |
| SPV                      | somatic P-value for somatic/LOH events (Varscan)                    | e.g.: 0.0187                                            |
| SSC                      | somatic score from Somatic Sniper                                   | e.g.: 123                                               |
| start                    | miRNA region start coordinate                                       | e.g.: 1167853, 20633667                                 |
| start_pre_build          | miRBase start coordinate                                            | e.g.: 1167863, 20633679                                 |
| stop                     | miRNA region stop coordinate                                        | e.g.: 1167877, 20633691                                 |
| stop_pre_build           | miRBase stop coordinate                                             | e.g.: 1167952, 20633788                                 |
| tumor                    | tumor column from VCF file in a structure as format column dictates | e.g.: 0/1:26,38:35,34:64:2                              |
| tumor_alt_count          | count of reads supporting alternative allele in tumor sample        | e.g.: 25                                                |
| tumor_ref_count          | count of reads supporting reference allele in tumor sample          | e.g.: 21                                                |
| type                     | region of miRNA precursor                                           | flanking-5, pre-seed, seed, post-seed, loop, flanking-3 |
| type_of_file             | algorithm used to create VCF file                                   | e.g.: somaticsniper, varscan2                           |
| type_of_subst            | substitution type, n.a. for non-substitution mutations              | transition, transversion, n.a.                          |
| weight                   | weight score                                                        | 1, 1.5, 2                                               |
